# Supplementary figures and images for: Low PRKAB2 Expression Is Associated with Poor Outcomes in Pediatric Adrenocortical Tumors, and Treatment with Rottlerin Increases the PRKAB2 Level and Inhibits Tumorigenic Aspects in the NCI-H295R Adrenocortical Cancer Cell Line
Source: MDPI journal article supplement (doi:10.3390/cancers16061094), 2024-03-08

# PRKAB2

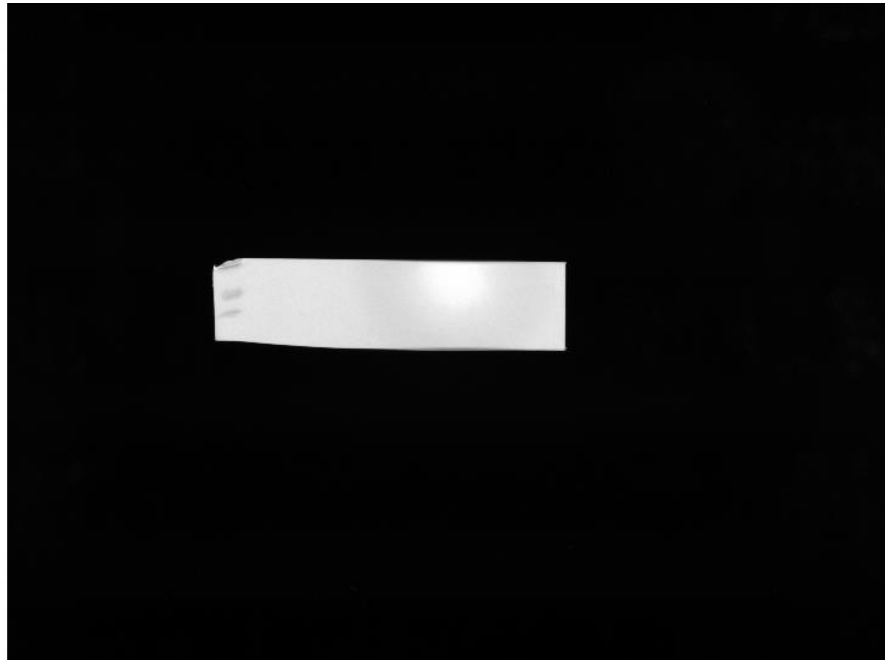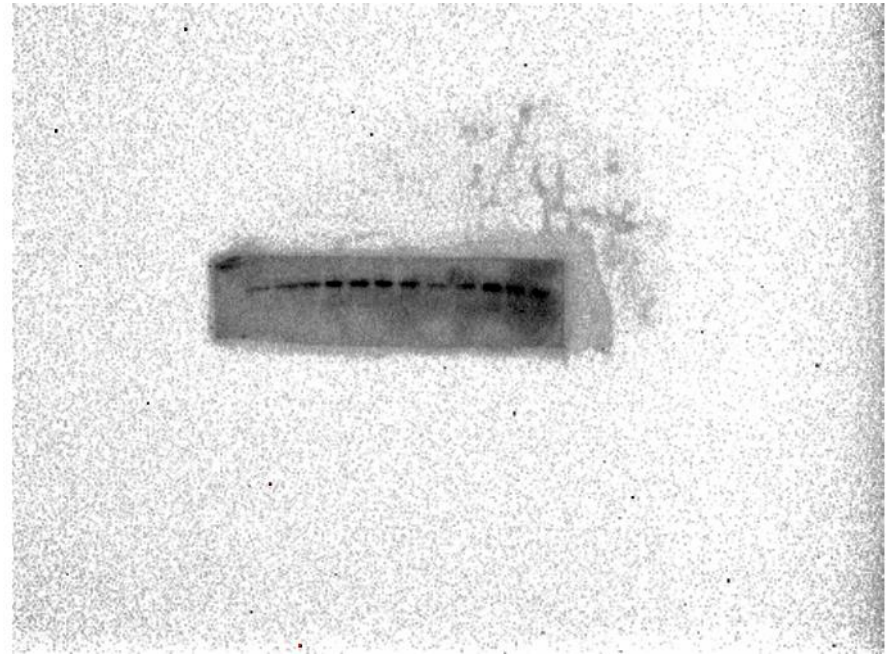

AMPK total

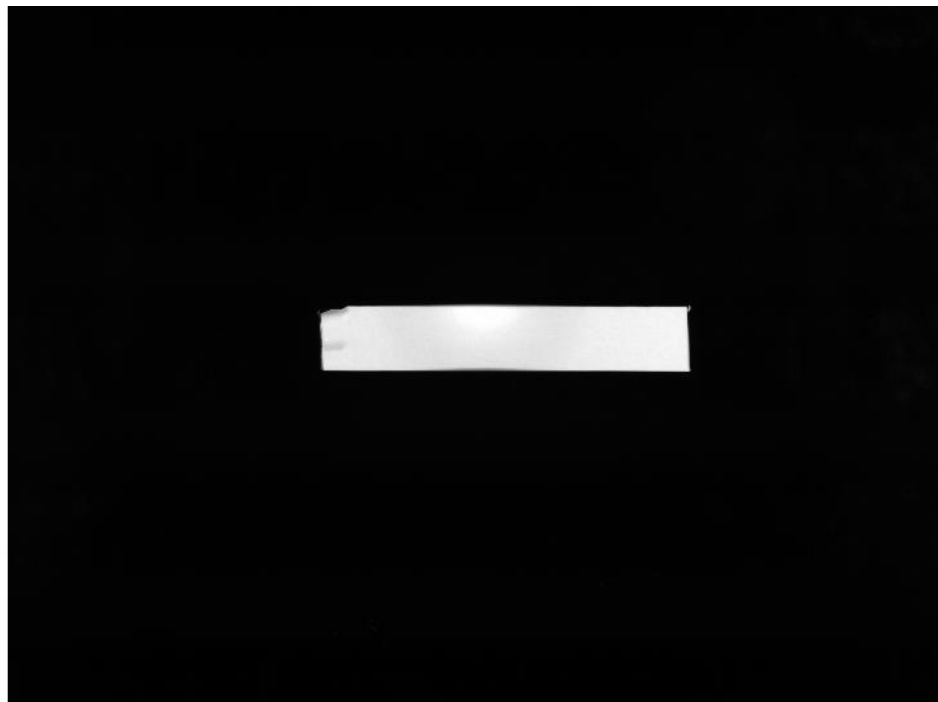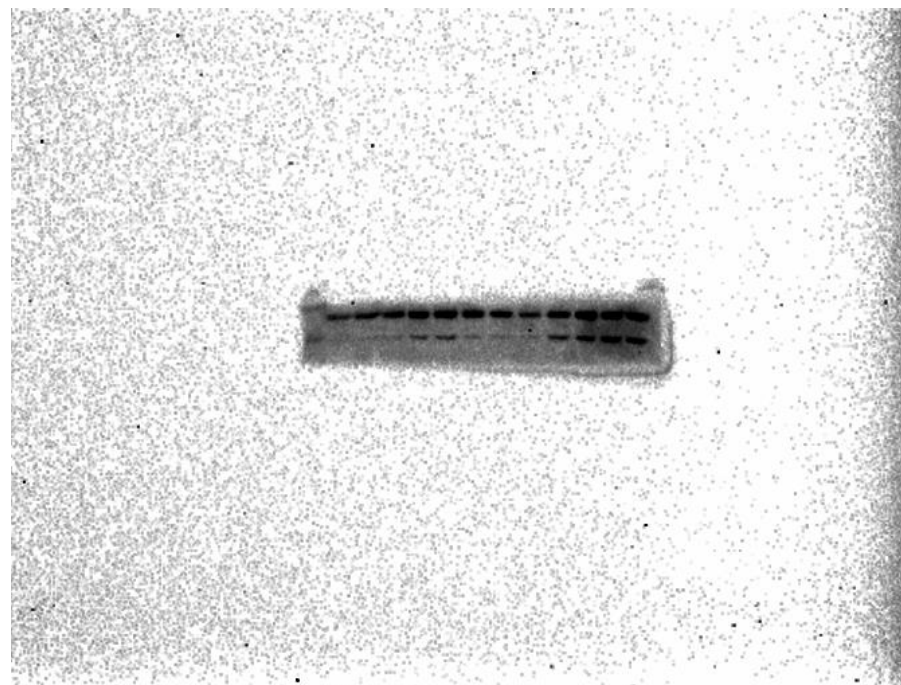

# P-AMPK

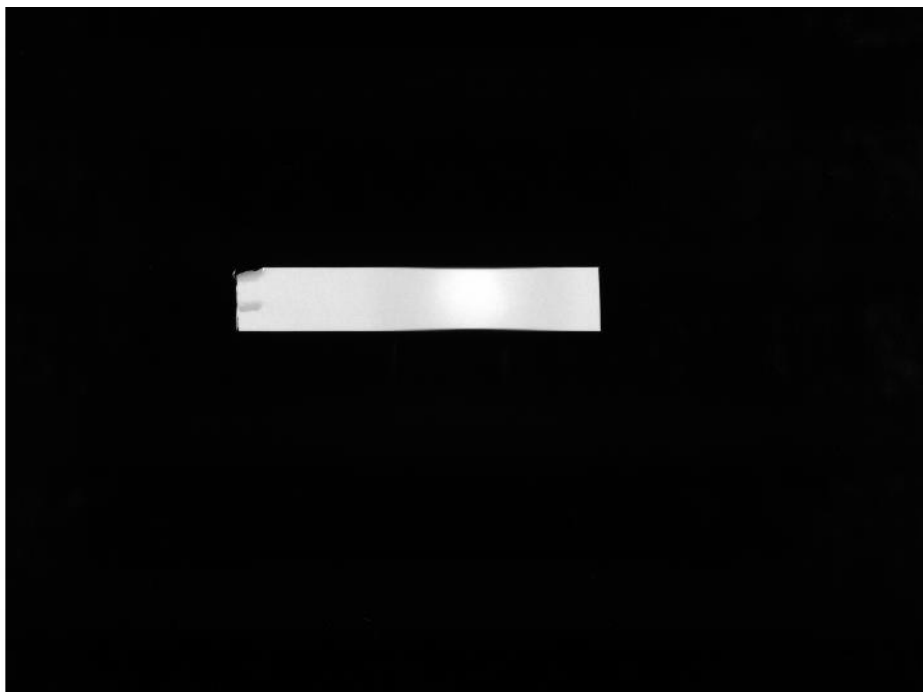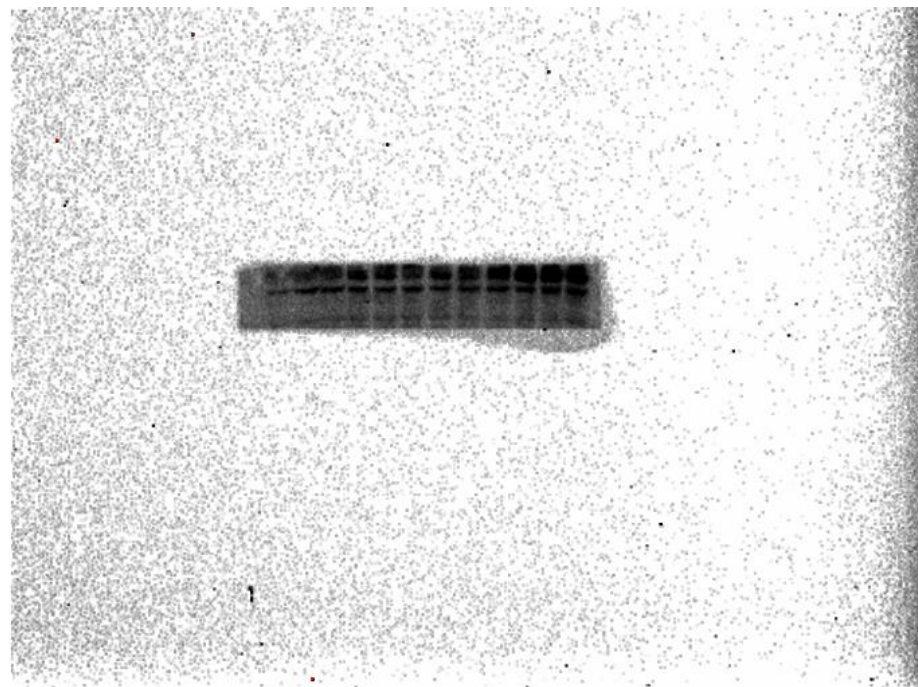

# GAPDH

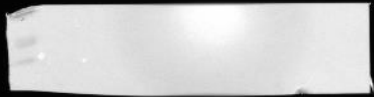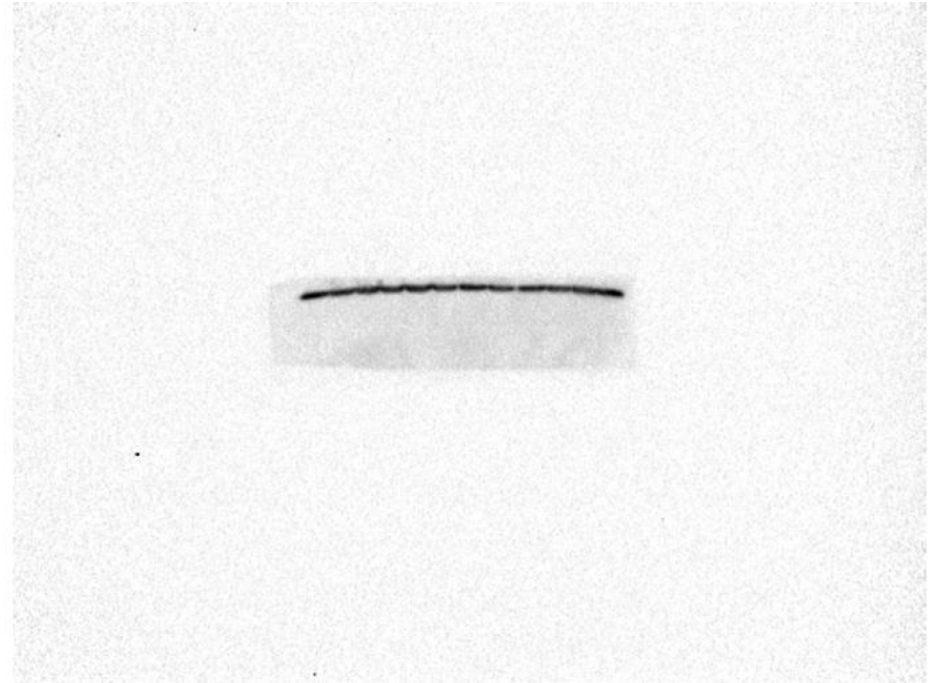

# ACC

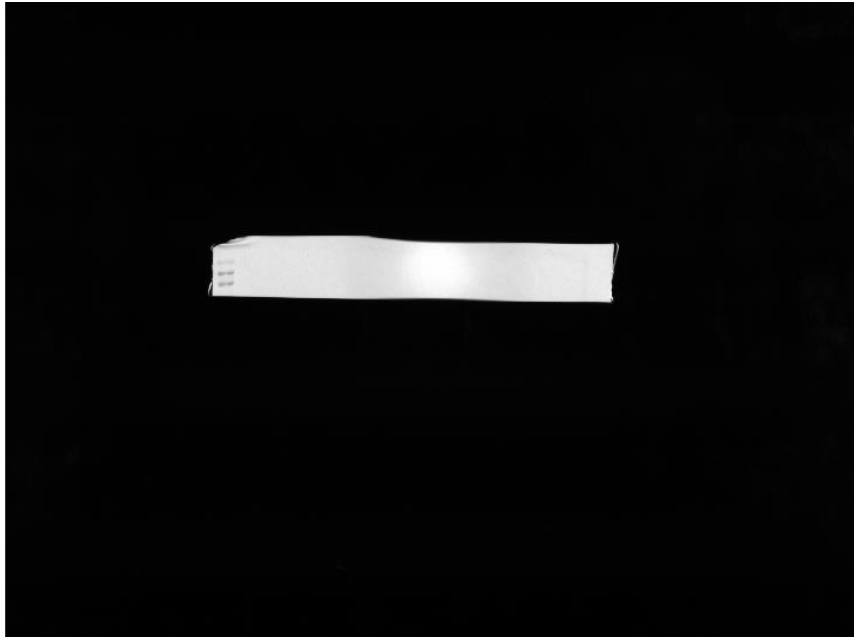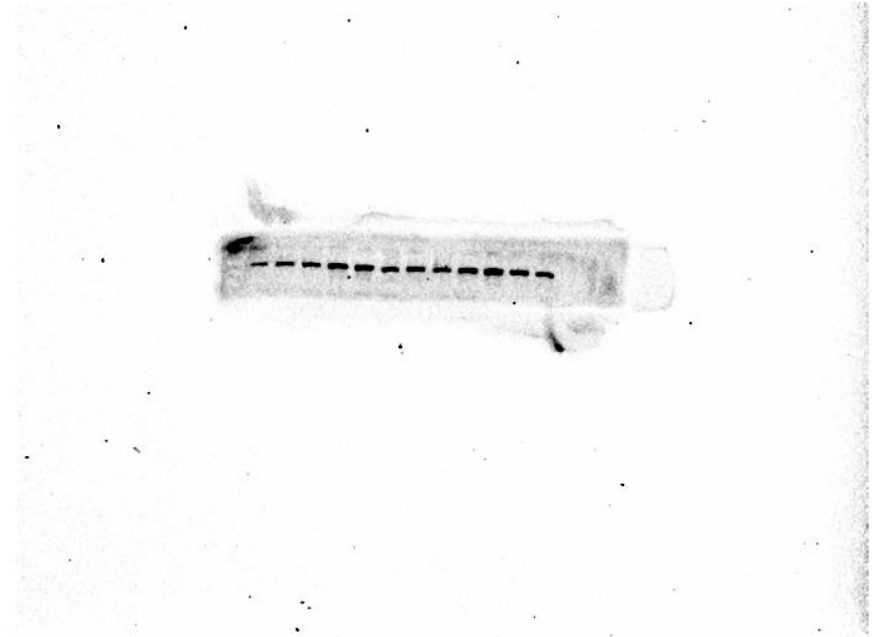

# MTOR-TOTAL

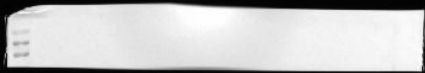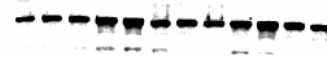

# P-MTOR

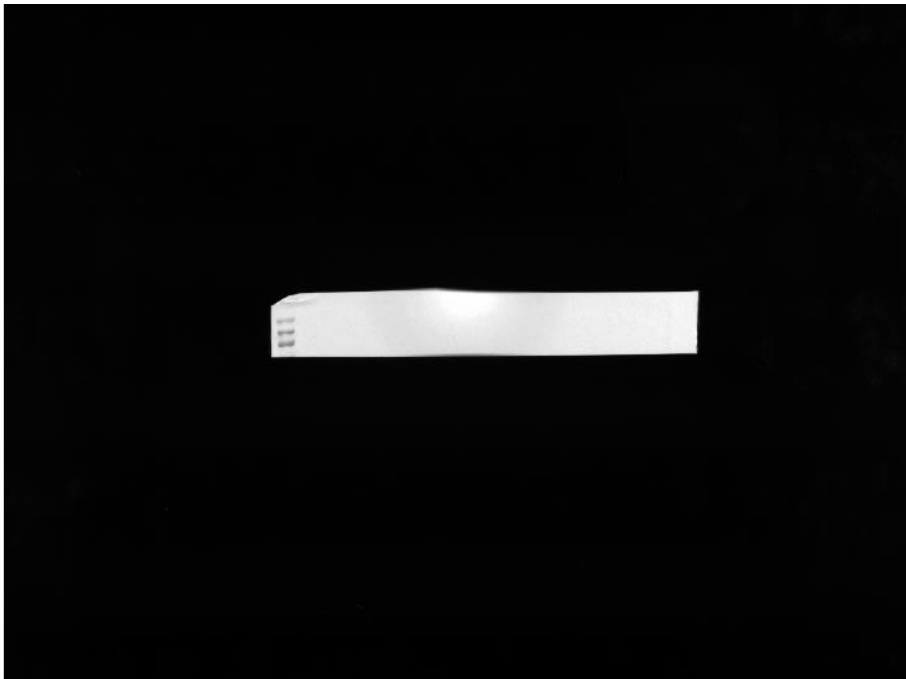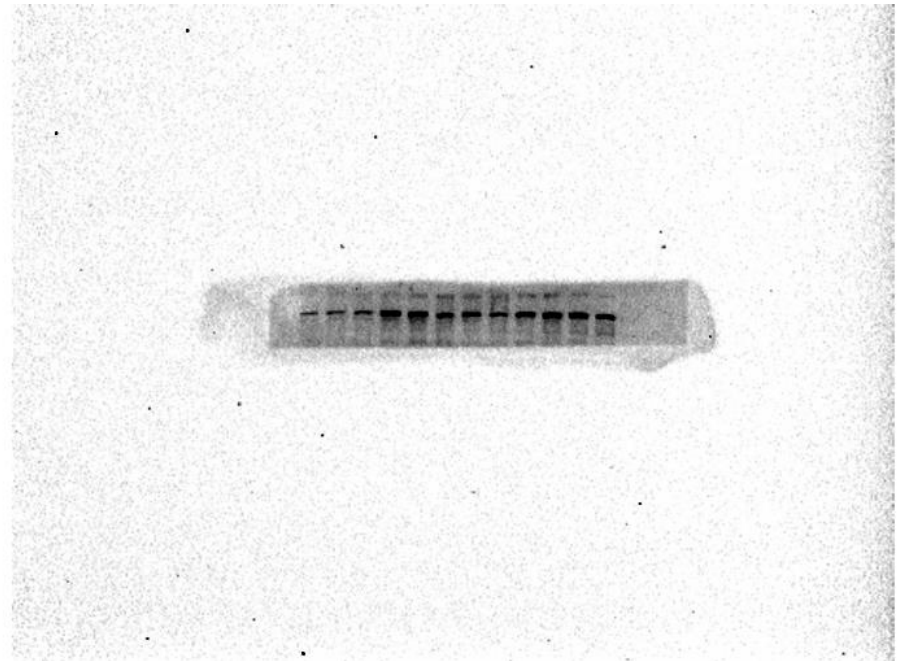

# GSK3B

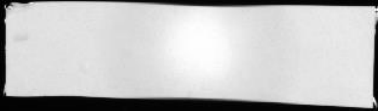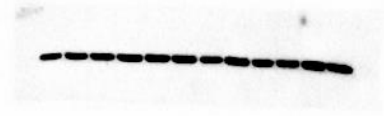



# P-GSK3B

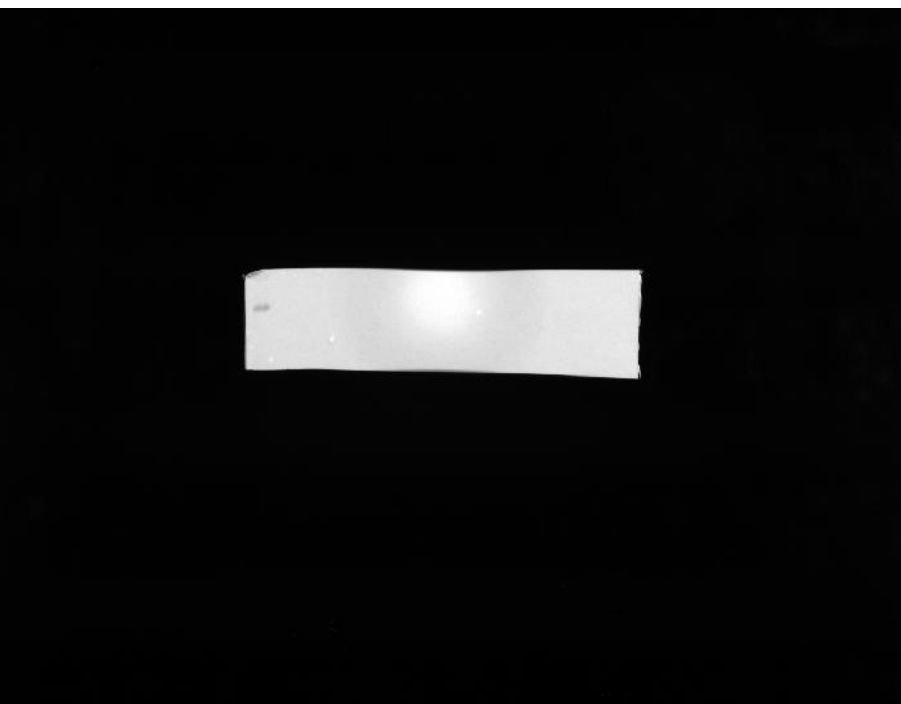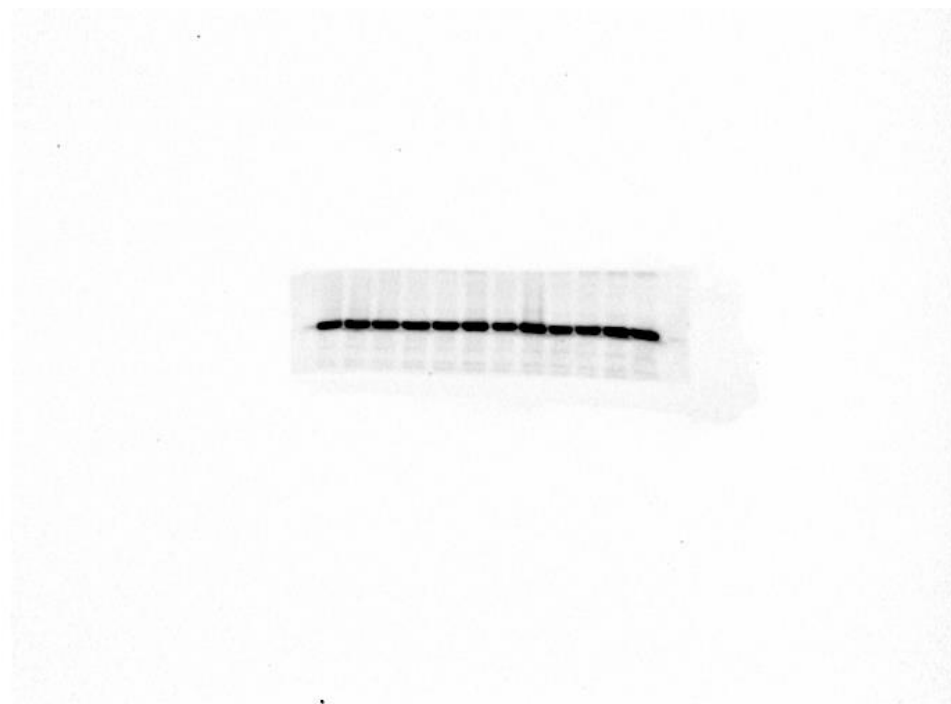

# SKP2

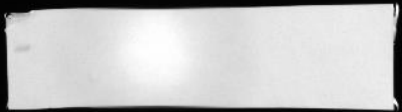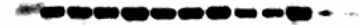

# GAPDH

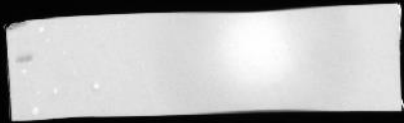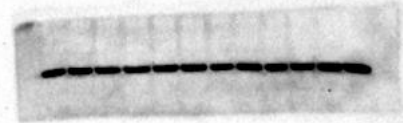

# LC3B

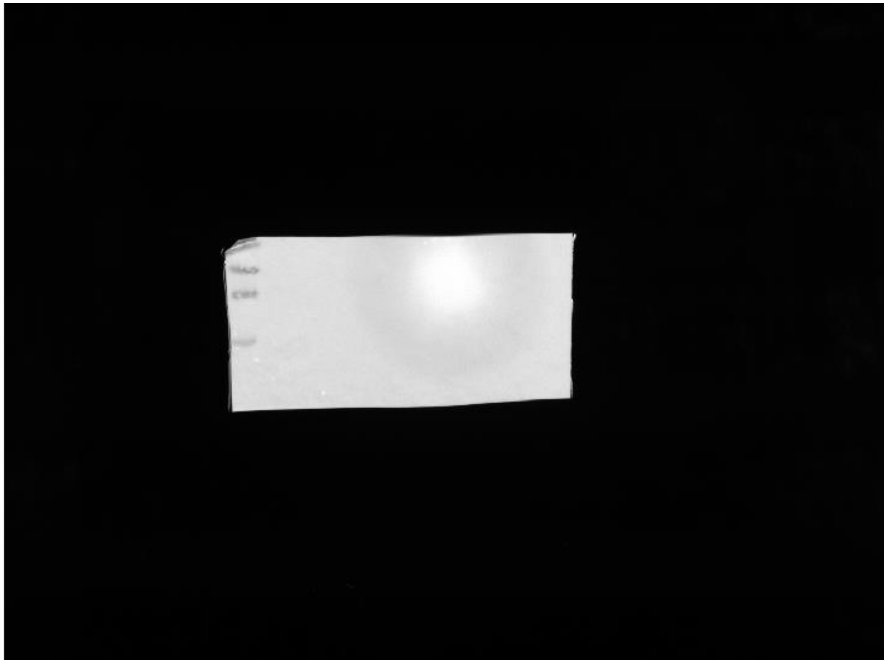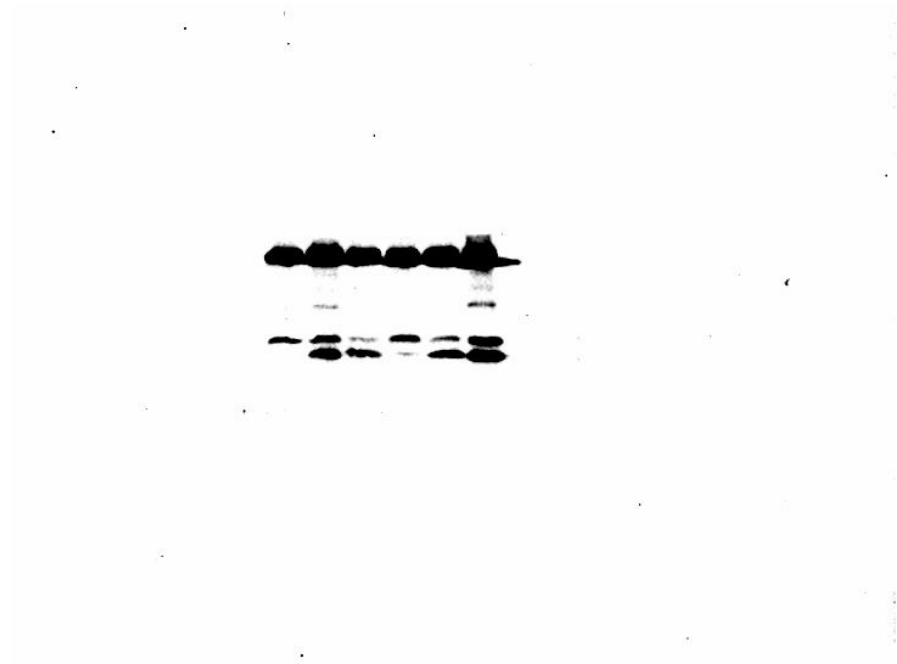

# BAX

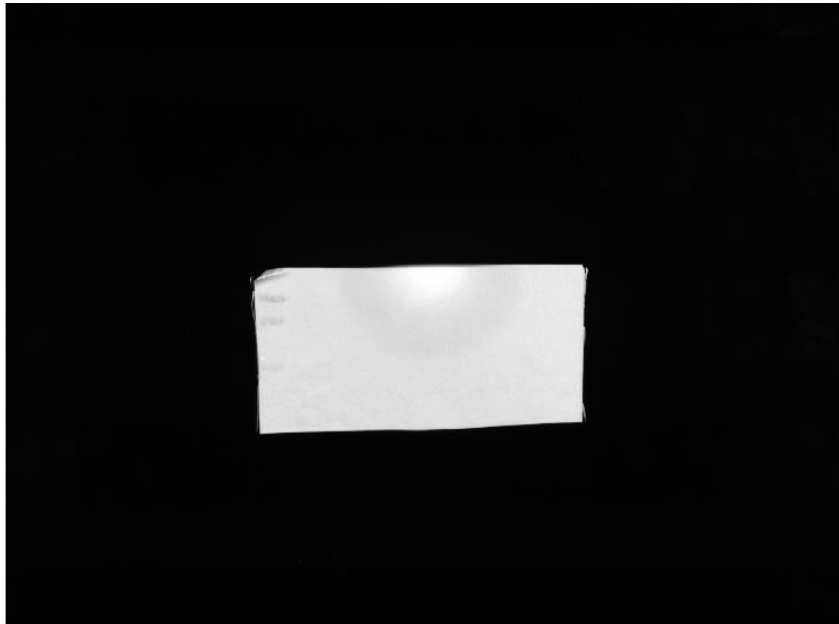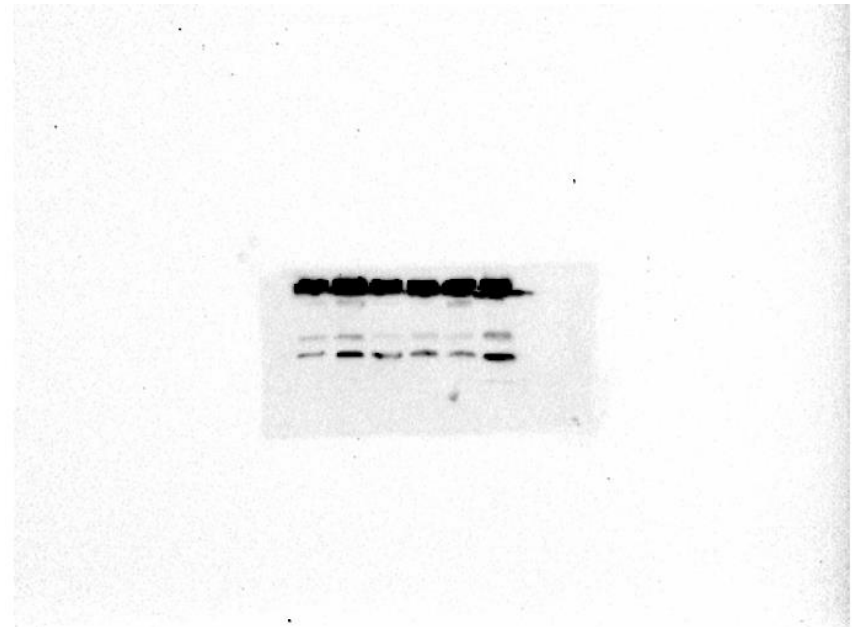

# GAPDH

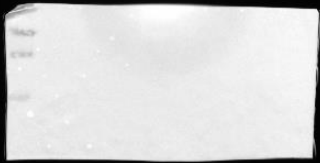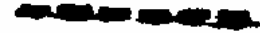

Supplement: s1 [file s1]
